# Supplementary material for: Unsupervised classification identifies coherent thermohaline structures in the Weddell Gyre region
Source: Copernicus journal article supplement (doi:10.5194/egusphere-2022-1484), 2023-01-05
Supplement: Supplementary file [file egusphere-2022-1484-AC3-supplement.pdf]

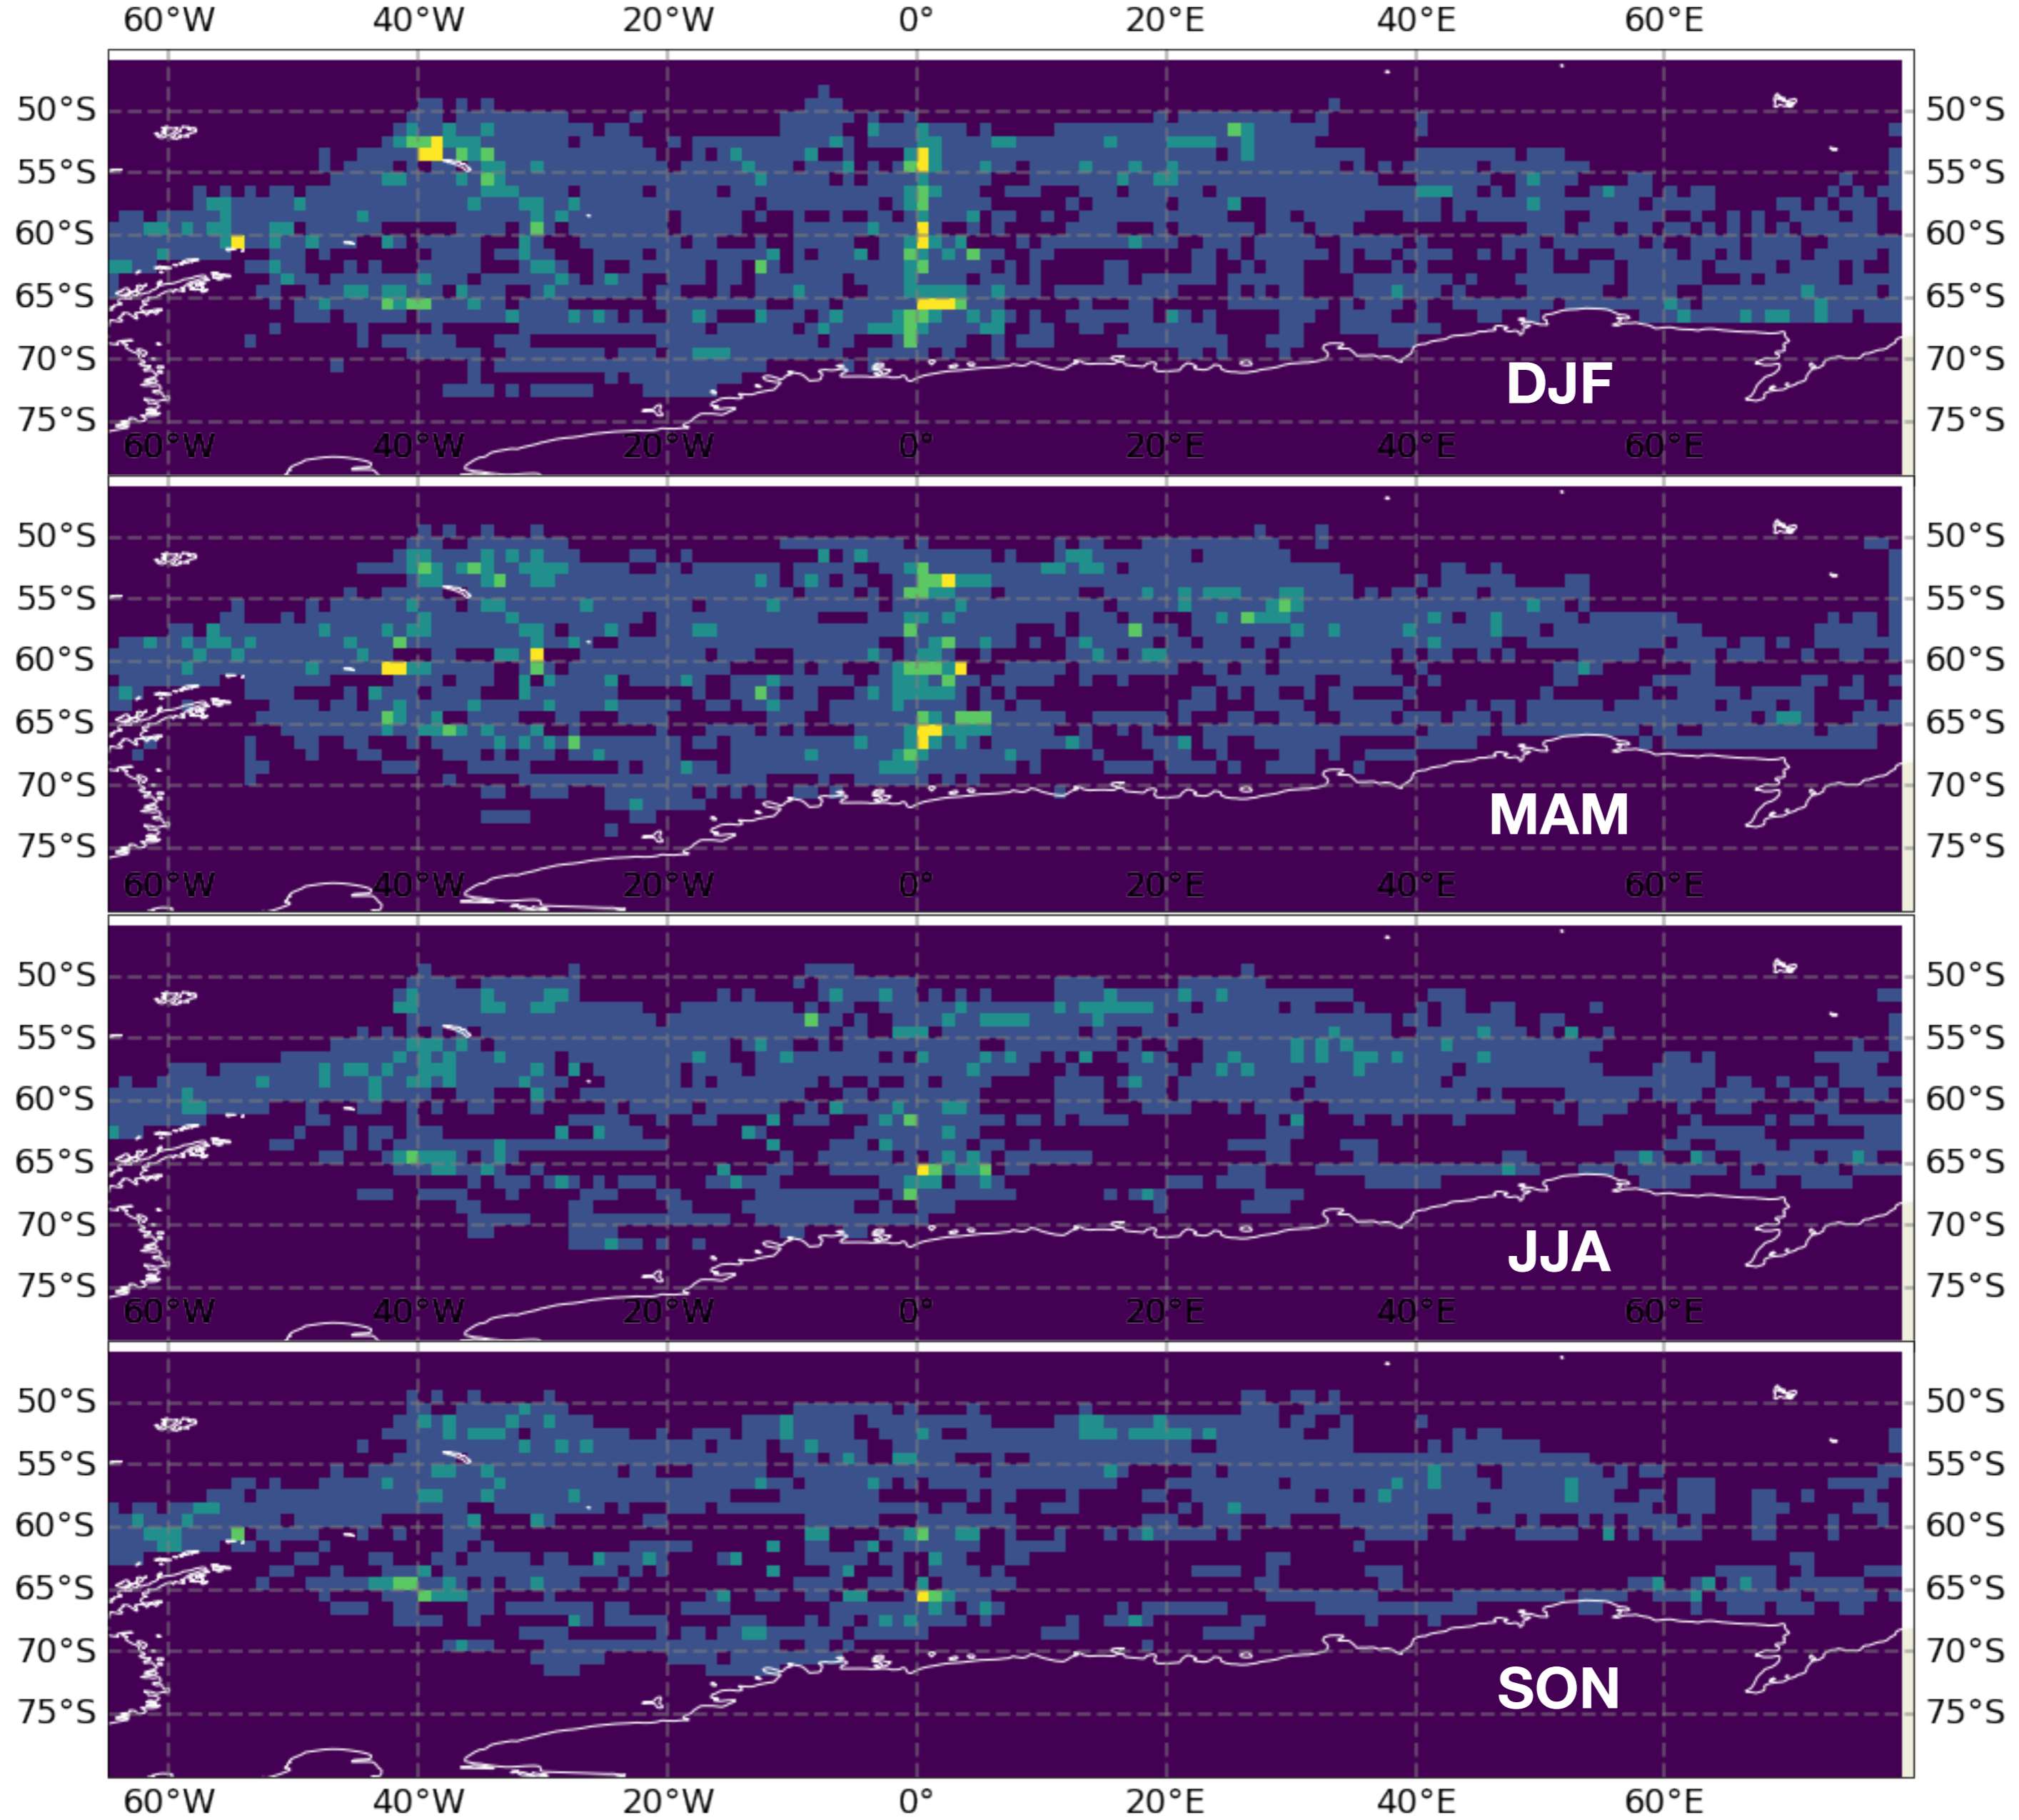

**Profile count**

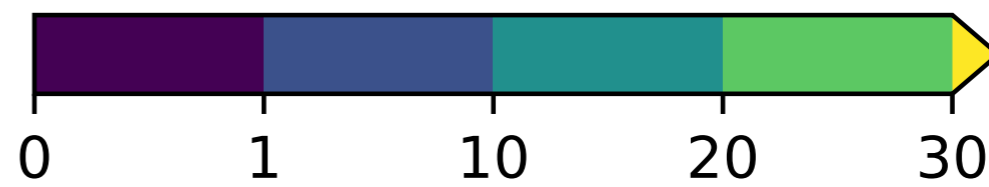

Count
